# Supplementary material
Source: MDPI journal article supplement (https://www.mdpi.com/2073-4344/13/7/1097)
Supplement: s1 [file s1]

## SUPPLEMENTARY INFORMATION

# Synthesis of New Dehydrodieugenol Derivatives via Olefin Cross Metathesis and In Vitro Evaluation of Their Trypanocidal Activity

Thalita S. Galhardo <sup>1</sup>, Anderson K. Ueno <sup>2</sup>, Wagner A. Carvalho <sup>1</sup>, Thais A. Costa-Silva <sup>1</sup>, Marina M. Gonçalves <sup>1</sup>, Mariana B. Abiuze <sup>3</sup>, Andre G. Tempone <sup>3</sup>, João Henrique G. Lago <sup>1,\*</sup>, Dalmo Mandelli <sup>1</sup>, Cedric Fischmeister <sup>4,\*</sup> and Christian Bruneau <sup>4</sup>

<sup>1</sup> Center for Natural and Human Sciences, Federal University of ABC, Santo André 09210-180, Brazil; thata.galhardo@gmail.com (T.S.G.); wagner.carvalho@ufabc.edu.br (W.A.C.); tha\_isbio@yahoo.com.br (T.A.C.-S.); marina.monroe@ufabc.edu.br (M.M.G.); dalmo.mandelli@ufabc.edu.br (D.M.)

<sup>2</sup> Institute of Environmental, Chemical, and Pharmaceutical Sciences, Federal University of São Paulo, Diadema 09972-270, Brazil; ueno.unifesp@gmail.com

<sup>3</sup> Center for Parasitology and Mycology, Instituto Adolfo Lutz, São Paulo 01246-902, Brazil; mariana.abiuze@gmail.com (M.B.A.); andre.tempone@ial.sp.gov.br (A.G.T.)

<sup>4</sup> Institut des Sciences Chimiques de Rennes (ISCR)—UMR 6226, Université de Rennes, Centre National de la Recherche Scientifique (CNRS), Rennes, 35042, France; christian.bruneau@univ-rennes.fr (C.B.)

\* Correspondence: joao.lago@ufabc.edu.br (J.H.G.L.); cedric.fischmeister@univ-rennes.fr (C.F.)

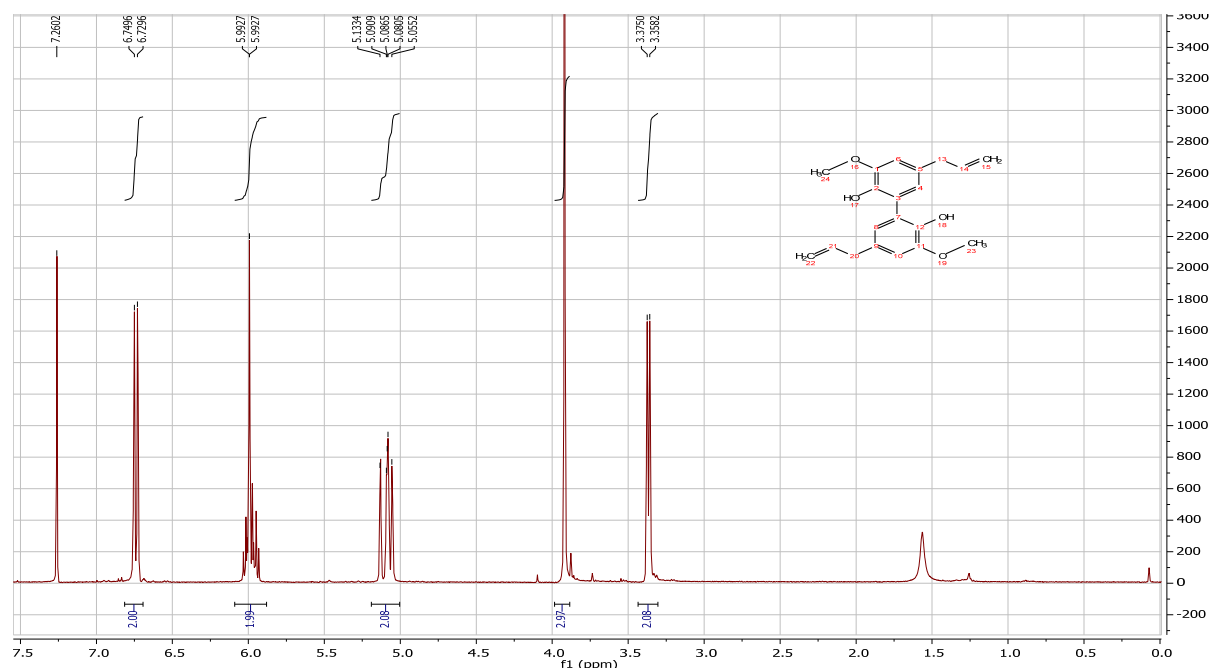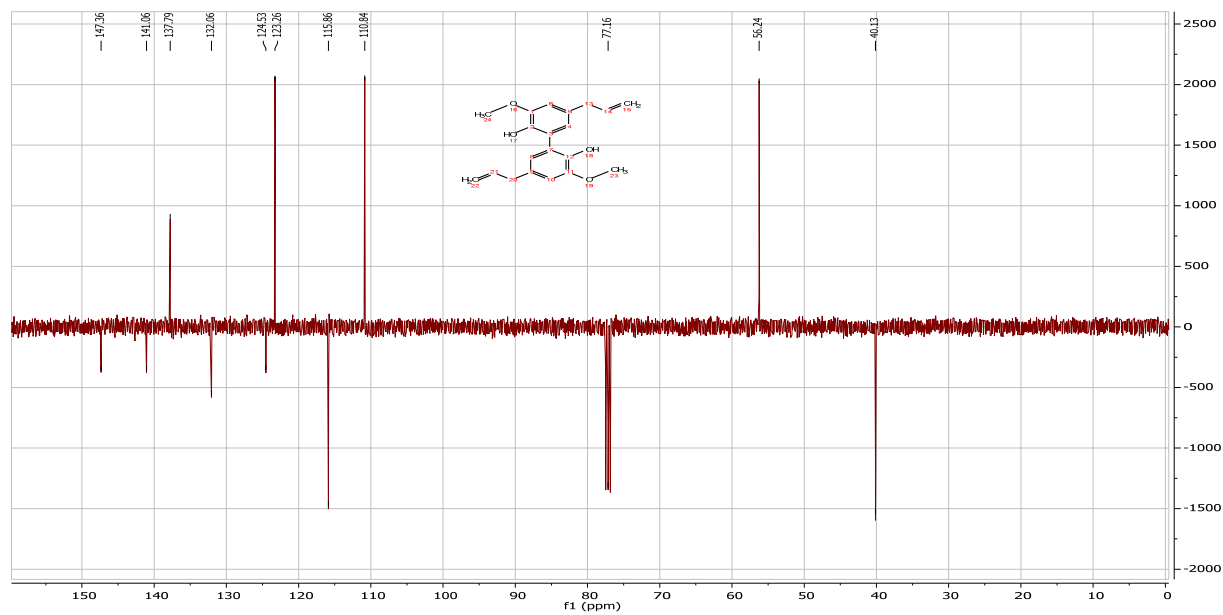

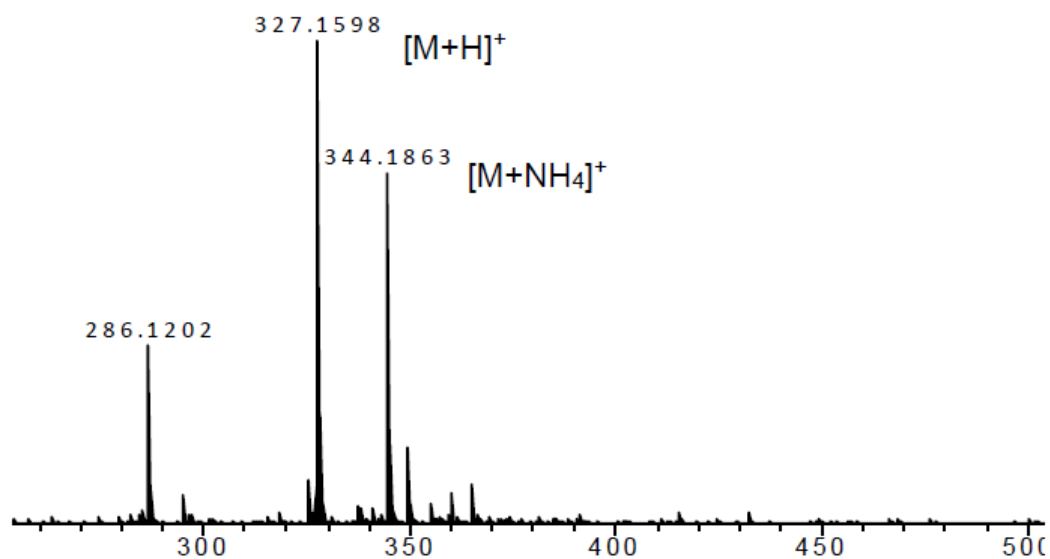

Figure S3. ESI-HRMS (positive mode) of 1.

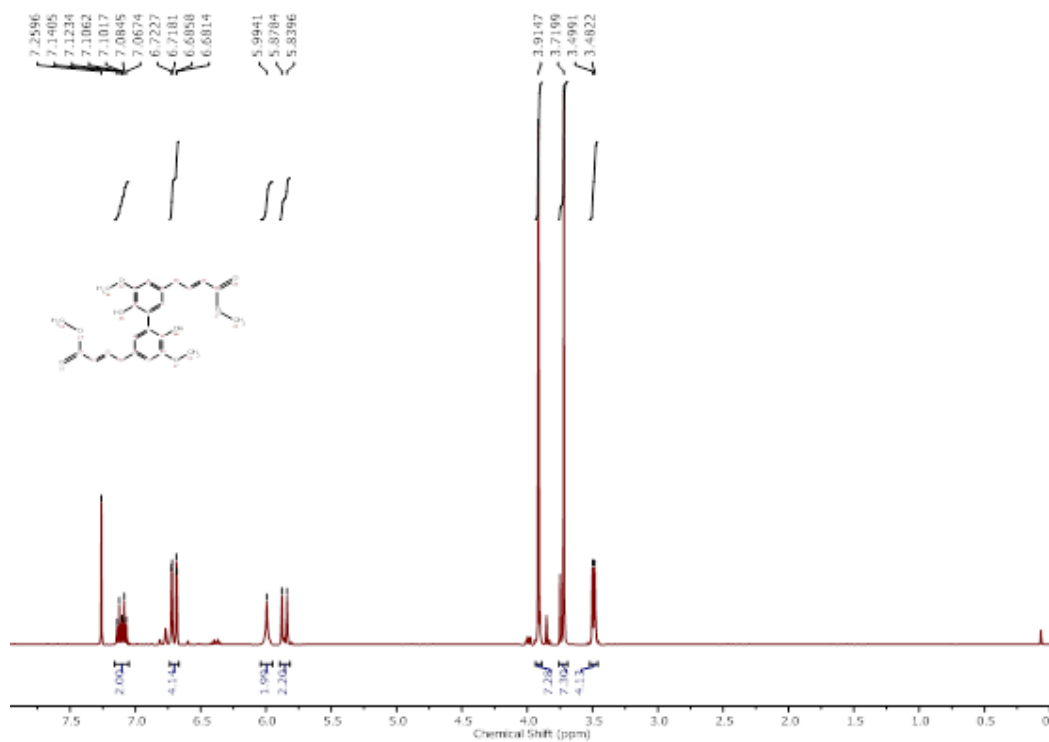Figure S4.  $^1H$  NMR ( $\delta$ ,  $CDCl_3$ , 400 MHz) of 3a.

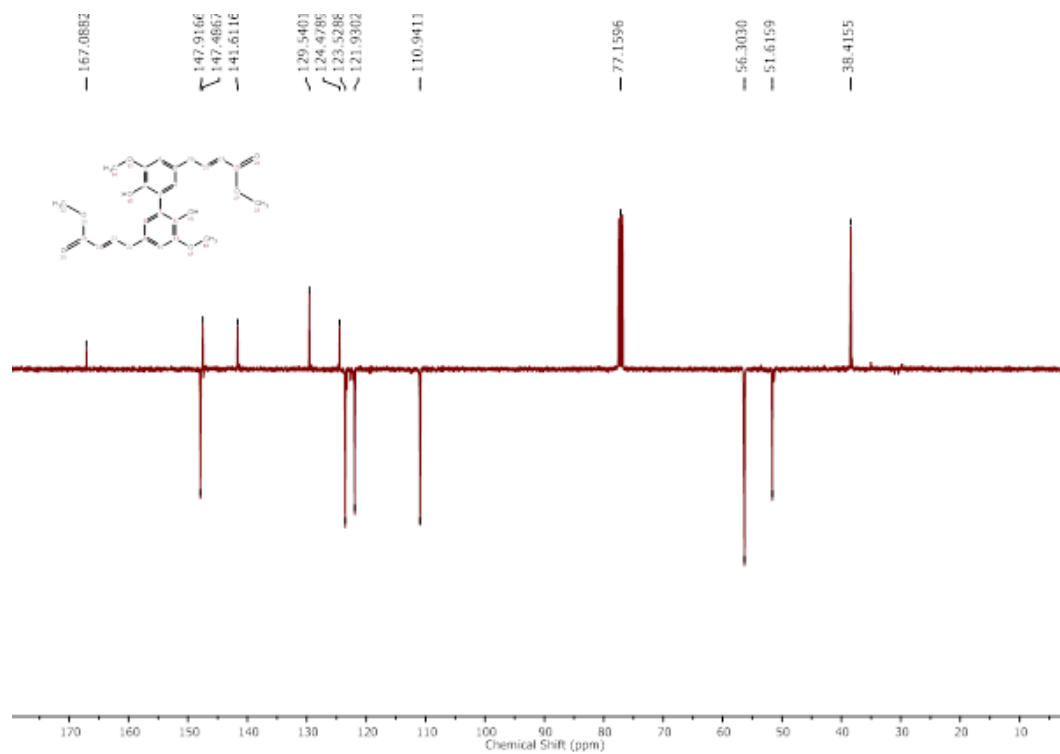

Figure S5. <sup>13</sup>C NMR (δ, CDCl<sub>3</sub>, 100 MHz) of 3a.

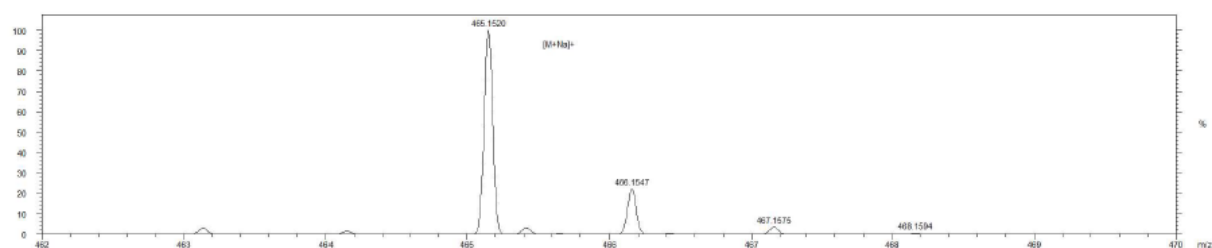

Figure S6. ESI-HRMS (positive mode) of 3a.

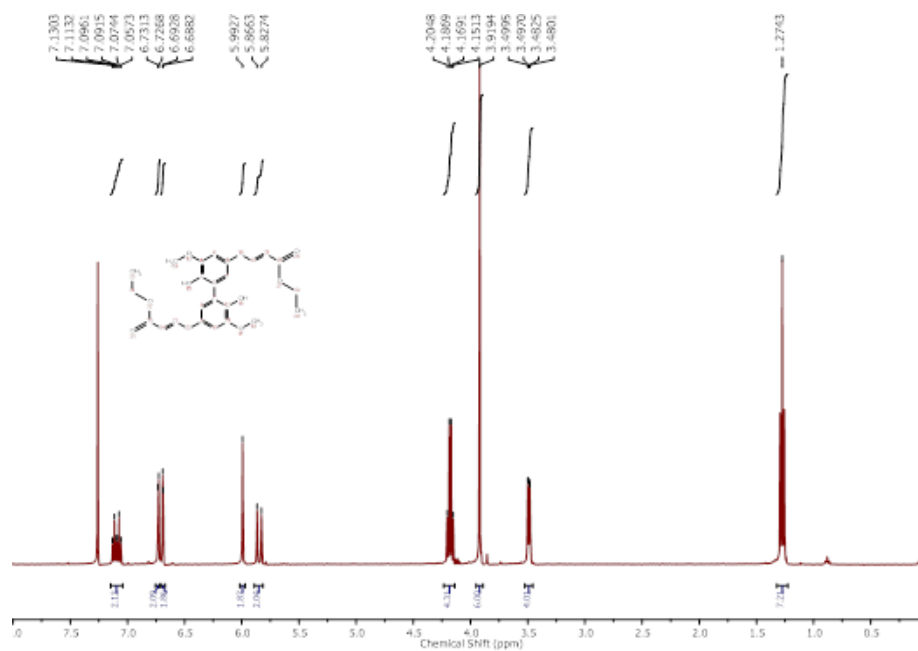

Figure S7. <sup>1</sup>H NMR (δ, CDCl<sub>3</sub>, 400 MHz) of 3b.

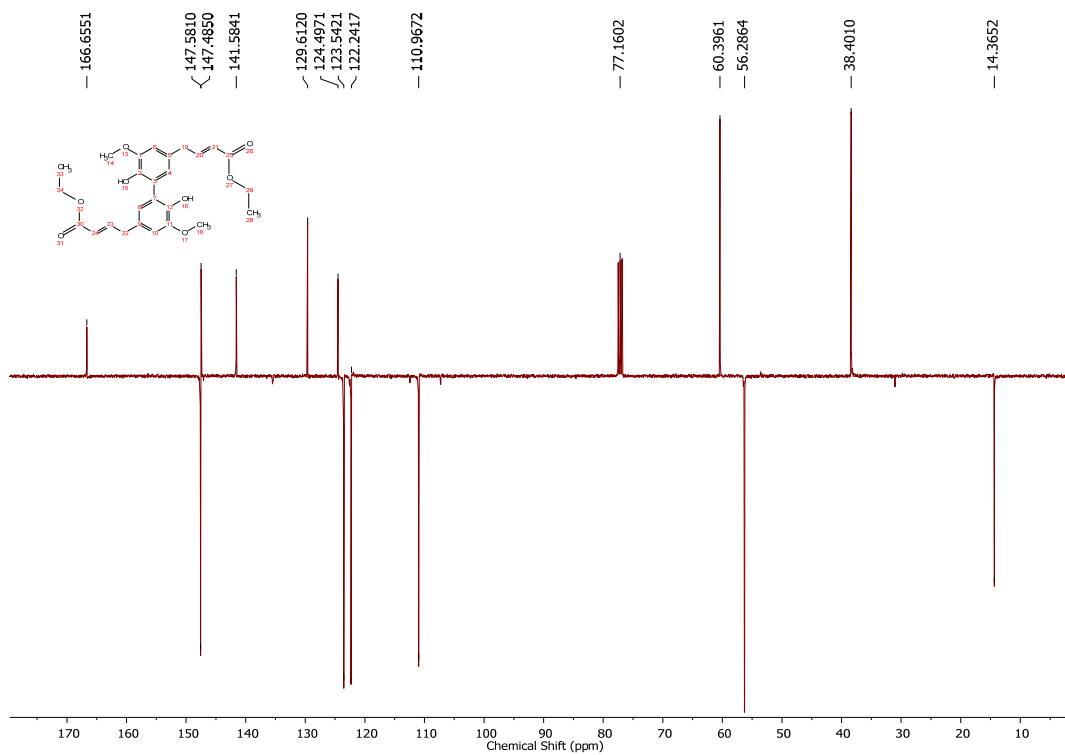

Figure S8. <sup>13</sup>C NMR (δ, CDCl<sub>3</sub>, 100 MHz) of 3b.

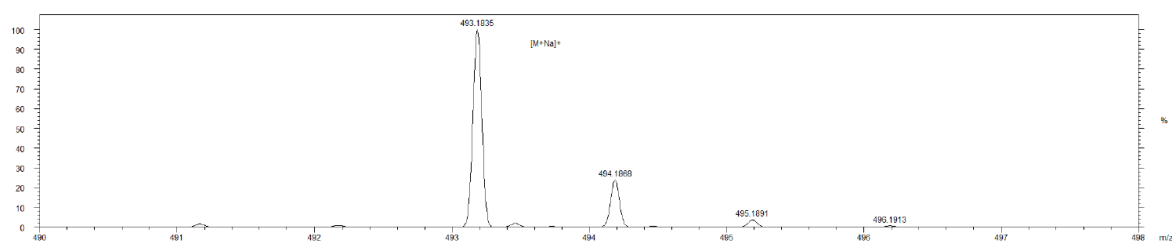

Figure S9. ESI-HRMS (positive mode) of 3b.

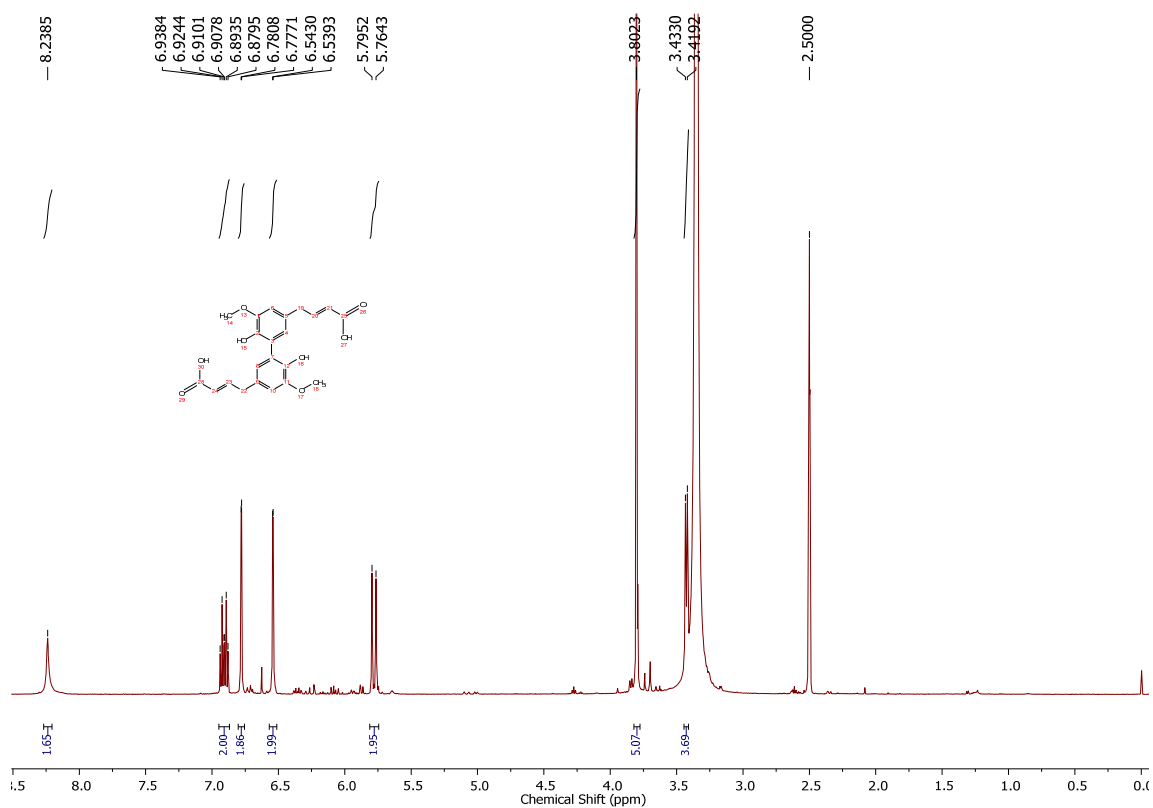Figure S10.  $^1\text{H}$  NMR ( $\delta$ ,  $\text{CDCl}_3$ , 500 MHz) of 3c.

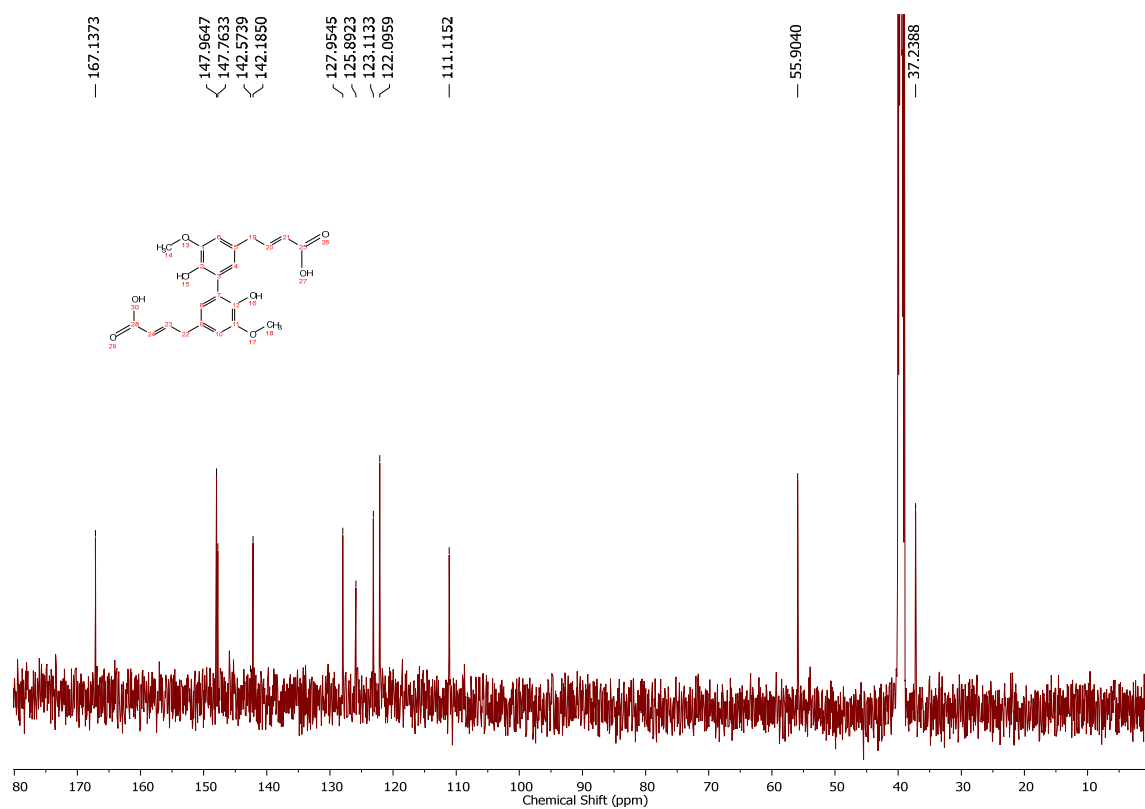

Figure S11. <sup>13</sup>C NMR (δ, CDCl<sub>3</sub>, 125 MHz) of **3c**.

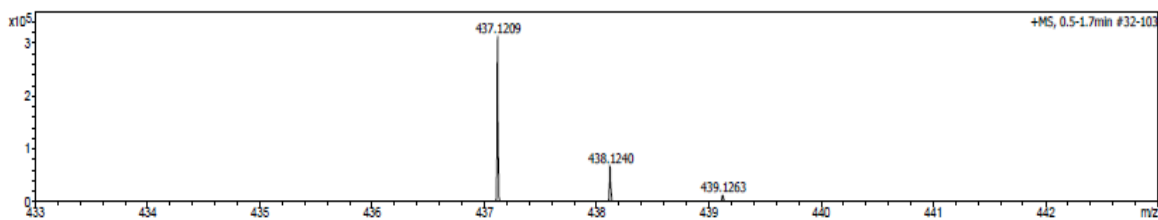

Figure S12. ESI-HRMS (positive mode) of **3c**.

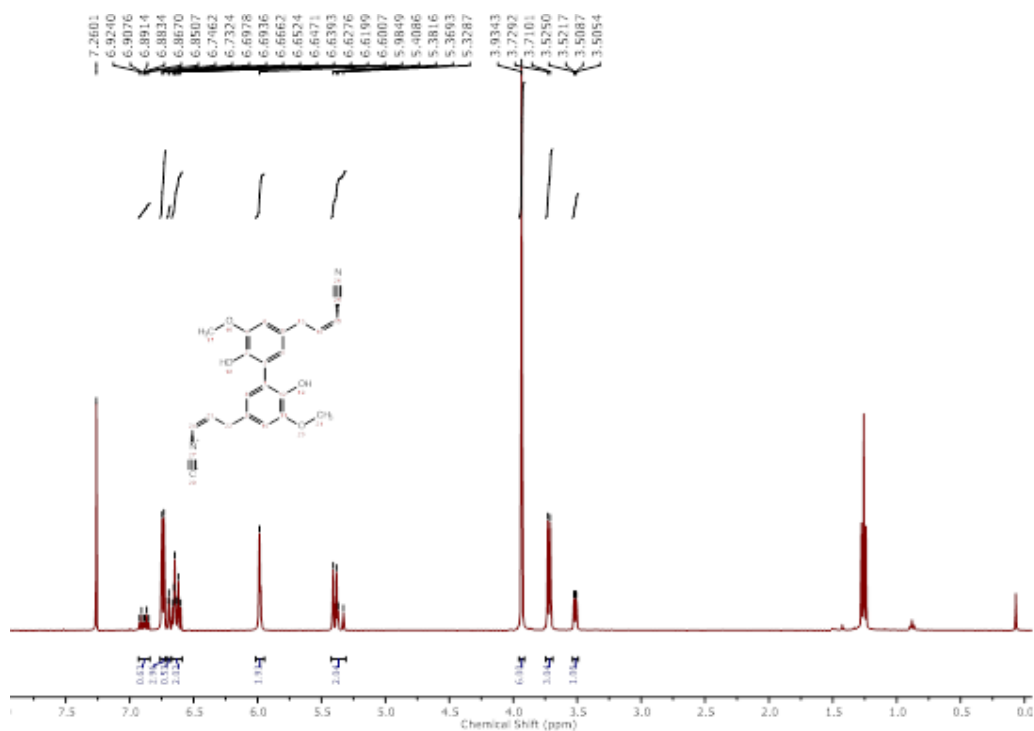Figure S13. <sup>1</sup>H NMR (δ, CDCl<sub>3</sub>, 400 MHz) of 3d.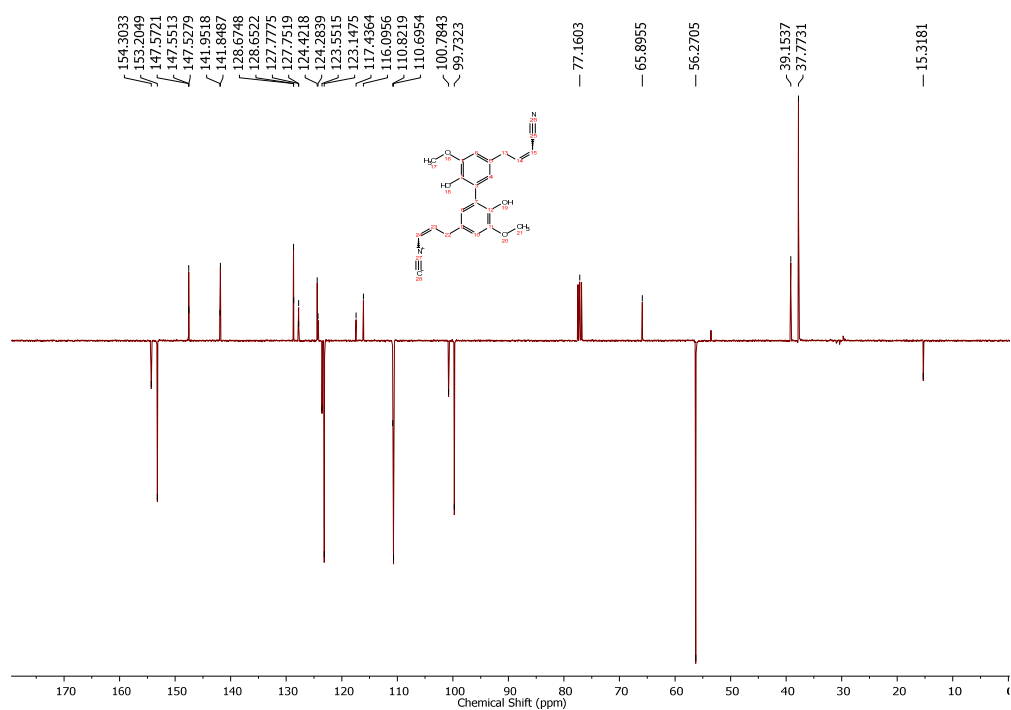Figure S14. <sup>13</sup>C NMR (δ, CDCl<sub>3</sub>, 100 MHz) of 3d.



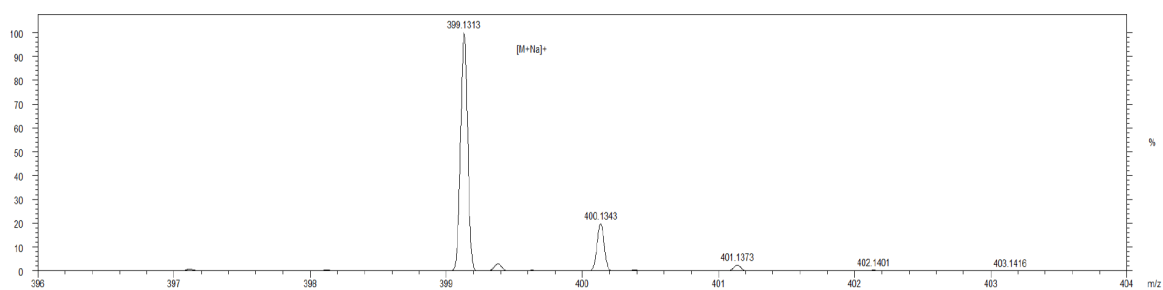

Figure S15. ESI-HRMS (positive mode) of 3d.

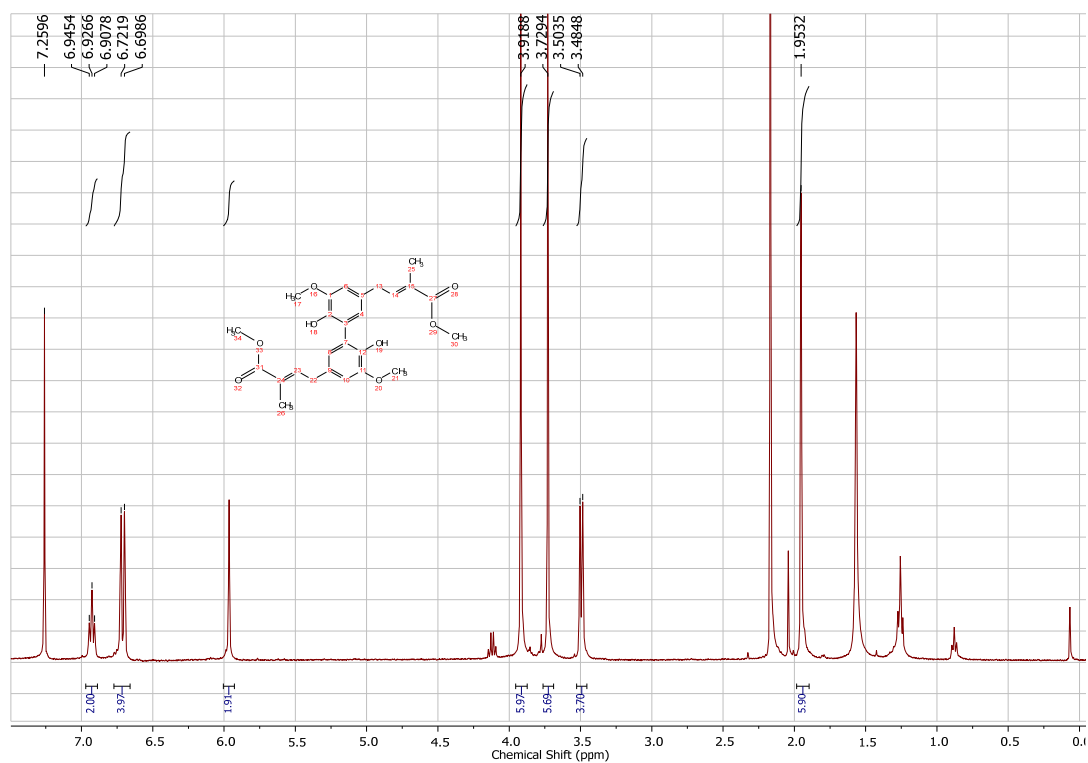Figure S16. <sup>1</sup>H NMR (δ, CDCl<sub>3</sub>, 400 MHz) of 3e.

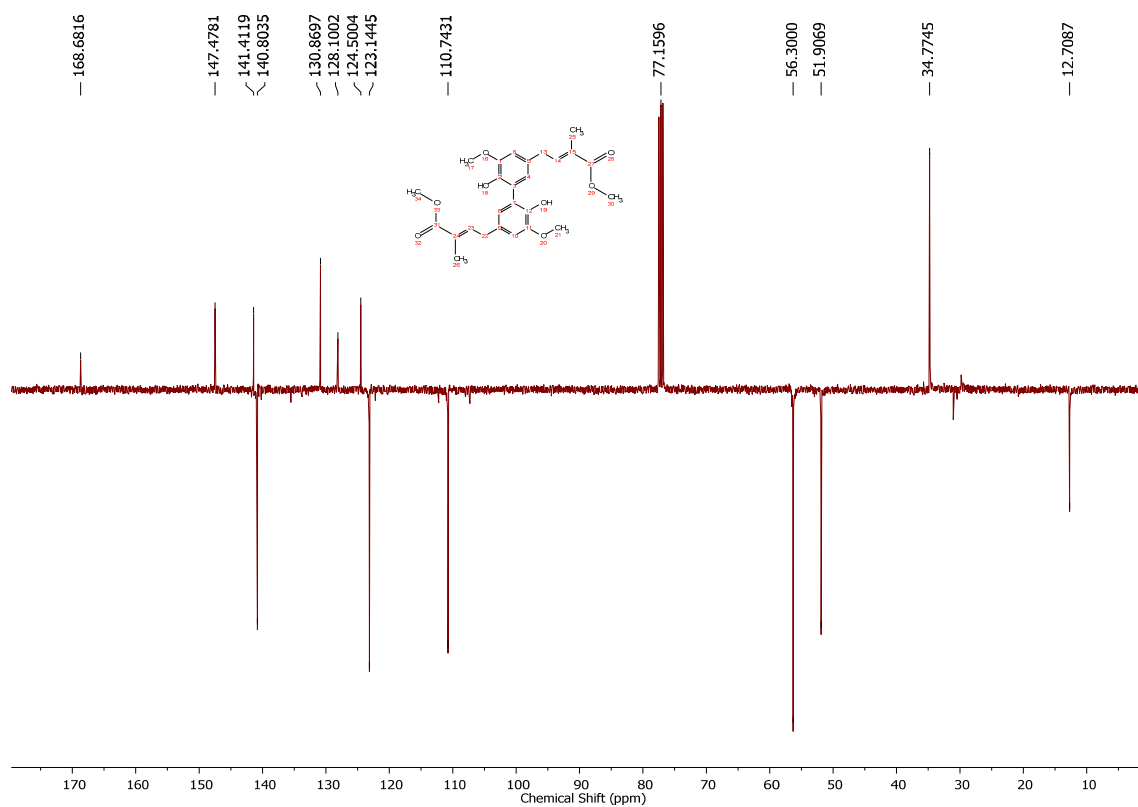

Figure S17. <sup>13</sup>C NMR (δ, CDCl<sub>3</sub>, 100 MHz) of 3e.

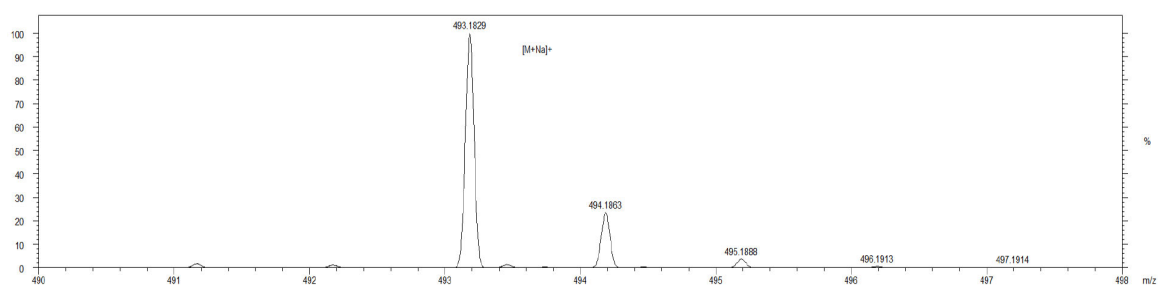

Figure S18. ESI-HRMS (positive mode) of 3e.

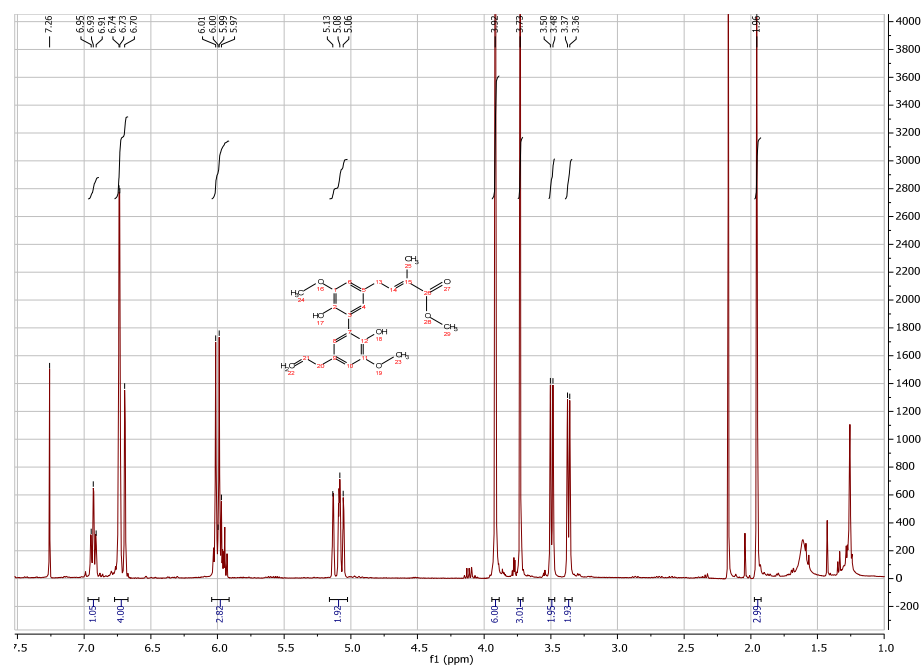

**Figure S19.**  $^1\text{H}$  NMR ( $\delta$ ,  $\text{CDCl}_3$ , 400 MHz) of **4e** - mono cross metathesis of **1** with methyl methacrylate (**2e**).
